# Supplementary material for: Intraocular scattering as a predictor of driving performance in older adults with cataracts
Source: PubMed Central journal article supplement (PMC6959599; doi:10.1371/journal.pone.0227892), 2020-01-14
Supplement: pone.0227892.s001.pdf [file pone.0227892.s001.pdf]

**S1 Table. Data underlying the findings described in the manuscript.**

| ID | GROUP* | AGE | VA<br>(Log MAR) | CS<br>(Log CS) | VDI  | OSI  | MEAN SPEED<br>DUAL<br>CARRIAGEWAY<br>(km/h) | SDLP<br>(m) | DISTANCE<br>TRAVELLED<br>INVADING<br>THE<br>OPPOSITE<br>LANE<br>(m) | TOTAL<br>DISTANCE<br>TRAVELLED<br>OUTSIDE THE<br>LANE<br>(m) | MEAN<br>SPEED<br>MOUNTAIN<br>ROAD (km/h) | TOTAL<br>TIME<br>(s) | ODPS  |
|----|--------|-----|-----------------|----------------|------|------|---------------------------------------------|-------------|---------------------------------------------------------------------|--------------------------------------------------------------|------------------------------------------|----------------------|-------|
| 1  | 0      | 65  | 0.30            | 0.89           | 1.00 | 7.25 | 102.38                                      | 0.70        |                                                                     | 1988.91                                                      | 49.57                                    | 749.67               | -1.11 |
| 2  | 0      | 72  | 0.30            | 0.74           | 0.83 | 3.65 | 78.85                                       | 0.84        | 524.51                                                              | 841.39                                                       | 44.14                                    | 823.08               | -0.87 |
| 3  | 0      | 56  | 0.30            | 1.29           | 0.80 | 1.85 | 95.44                                       | 0.56        | 768.78                                                              | 784.37                                                       | 47.99                                    | 842.96               | -0.22 |
| 4  | 0      | 59  | 0.30            | 0.74           | 1.00 |      | 106.06                                      | 0.95        | 773.25                                                              | 1032.27                                                      | 37.62                                    | 953.38               | -1.79 |
| 5  | 0      | 61  | 0.22            | 1.10           | 0.31 | 1.40 | 109.67                                      | 0.72        | 640.28                                                              | 793.00                                                       | 48.56                                    | 721.44               | -0.15 |
| 6  | 0      | 73  | 0.15            | 1.32           | 0.53 | 3.60 | 79.51                                       | 1.00        | 743.11                                                              | 1359.82                                                      | 59.20                                    | 758.49               | -1.4  |
| 7  | 0      | 77  | 0.20            | 1.22           | 0.90 | 6.15 | 90.77                                       | 0.59        | 941.11                                                              | 947.81                                                       | 41.41                                    | 858.10               | -0.48 |
| 8  | 0      | 62  | 0.22            | 1.17           | 0.88 | 1.70 | 106.84                                      | 0.58        | 489.63                                                              | 546.52                                                       | 55.12                                    | 679.38               | 0.54  |
| 9  | 0      | 72  | 0.15            | 1.48           | 0.43 | 1.40 | 88.08                                       | 0.64        | 134.05                                                              | 263.24                                                       | 51.47                                    | 735.95               | 0.39  |
| 10 | 0      | 67  | 0.30            | 1.24           | 1.00 |      | 124.65                                      | 0.78        |                                                                     |                                                              | 54.69                                    | 636.05               |       |
| 11 | 1      | 59  | 0.00            | 1.78           | 0.16 | 0.90 | 129.31                                      | 0.73        | 431.11                                                              | 460.82                                                       | 59.54                                    | 618.61               | 0.48  |
| 12 | 1      | 65  | 0.00            | 1.65           | 0.21 | 1.25 | 110.90                                      | 0.55        | 568.55                                                              | 581.59                                                       | 51.23                                    | 717.61               | 0.44  |
| 13 | 1      | 66  | -0.10           | 2.01           | 0.20 | 0.65 | 116.44                                      | 0.54        | 310.00                                                              | 317.33                                                       | 55.97                                    | 660.61               | 0.89  |
| 14 | 1      | 71  | 0.00            | 1.75           | 0.18 | 1.15 | 112.38                                      | 0.72        | 410.00                                                              | 590.00                                                       | 56.54                                    | 812.00               | -0.34 |
| 15 | 1      | 61  | -0.10           | 1.95           | 0.81 | 0.70 | 120.38                                      | 0.64        | 140.00                                                              | 290.00                                                       | 55.89                                    | 640.31               | 0.74  |
| 16 | 1      | 63  | -0.10           | 1.65           | 0.24 | 0.55 | 127.20                                      | 0.67        | 570.00                                                              | 640.00                                                       | 59.65                                    | 745.71               | 0.00  |
| 17 | 1      | 66  | -0.10           | 1.9            | 0.16 | 0.80 | 103.49                                      | 0.65        | 631.06                                                              | 659.82                                                       | 56.65                                    | 681.41               | 0.28  |
| 18 | 1      | 61  | 0.00            | 1.60           | 0.11 | 1.25 | 95.79                                       | 0.55        | 101.47                                                              | 261.60                                                       | 56.24                                    | 707.60               | 0.72  |
| 19 | 1      | 64  | -0.15           | 1.55           | 0.12 | 1.80 | 105.09                                      | 0.48        | 200.82                                                              | 200.82                                                       | 55.05                                    | 690.61               | 1.01  |
| 20 | 1      | 57  | -0.08           | 1.96           | 0.12 | 0.65 | 115.67                                      | 0.58        | 346.40                                                              | 358.72                                                       | 54.18                                    | 668.91               | 0.73  |

\*Group: 0 = cataract; 1 = control
